# Supplementary material for: Infrared spectroscopy with multivariate analysis segregates low-grade cervical cytology based on likelihood to regress, remain static or progress
Source: Royal Society of Chemistry journal article supplement (doi:10.1039/c3ay42224k), 2014-01-01
Supplement: c3ay42224k1.pdf [file c3ay42224k1.pdf]

## Electronic Supplementary Information

### **Infrared spectroscopy with multivariate analysis segregates low-grade cervical cytology based on likelihood to regress, remain static or progress**

Nikhil C. Purandare, Imran I. Patel, Júlio Trevisan, Kássio M.G. Lima, Marwan Ma'Ayeh, Anne McHugh, Günther Von Büнау, Pierre L. Martin Hirsch, Walter J. Prendiville, Francis L. Martin

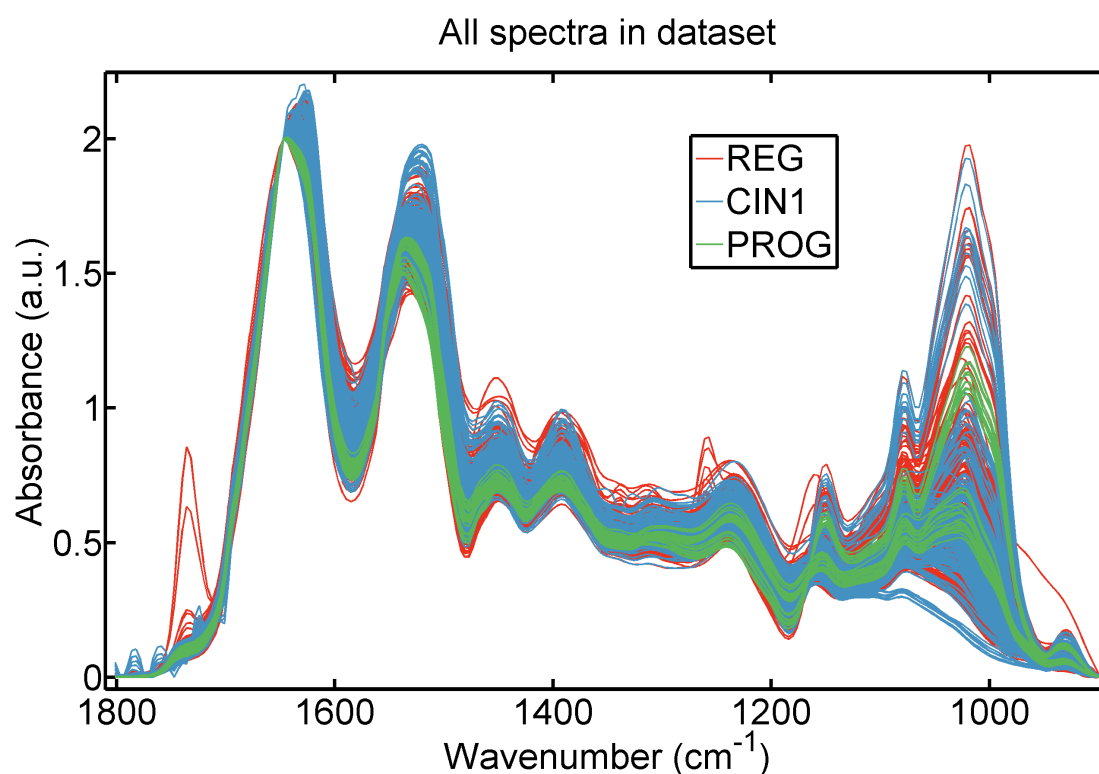

**Figure S1** - Plot showing all spectra from cervical cytology from  $n=67$  study participants (patients) after pre-processing. REG, regressive disease; CIN1, static disease; PROG, progressive disease after 12 months.

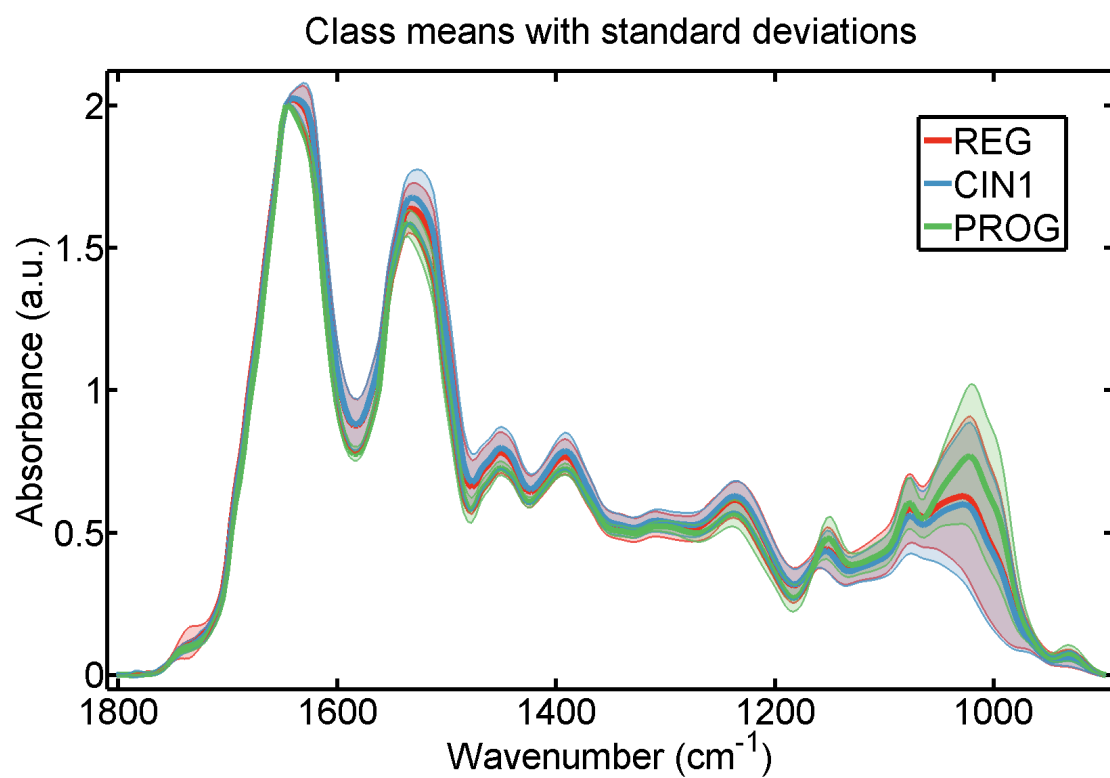

**Figure S2** - Mean spectrum per class with respective standard deviation bands. From the figure the need for multivariate analysis becomes evident, since the standard deviation bands are substantially superimposed. REG, regressive disease; CIN1, static disease; PROG, progressive disease after 12 months.

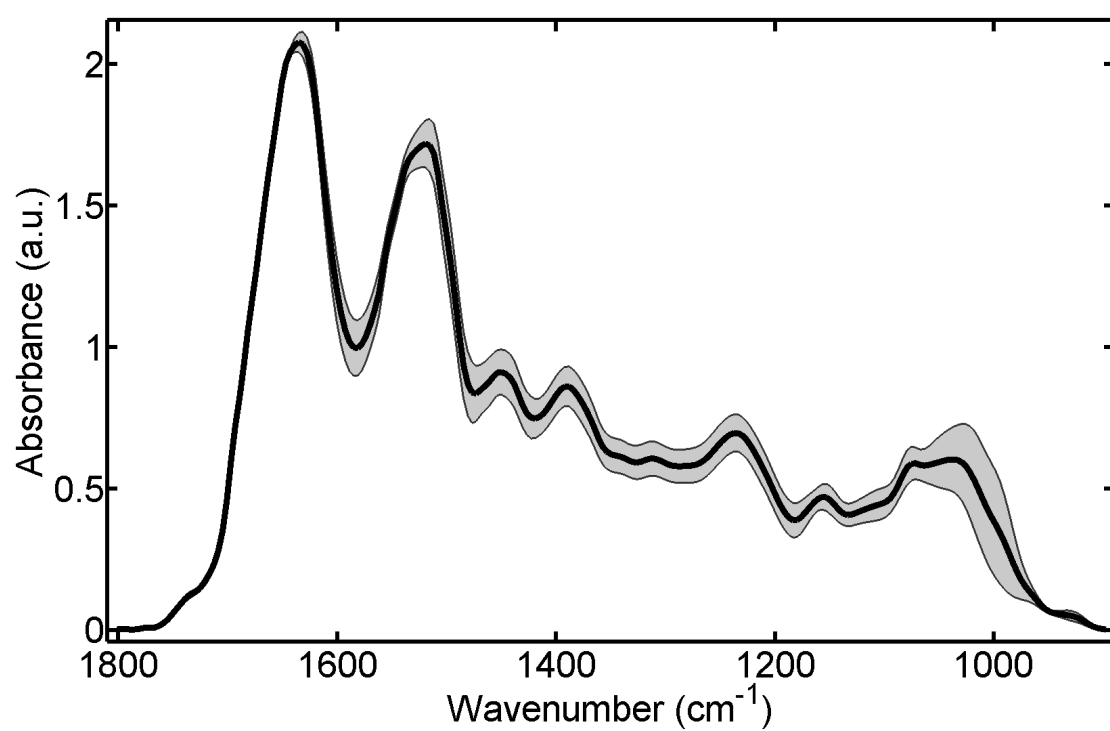

**Figure S3** - Mean spectrum with respective standard deviation band for the cervical cytology specimen [from a single study participant (patient)] with *highest* mean variance across all wavenumbers.

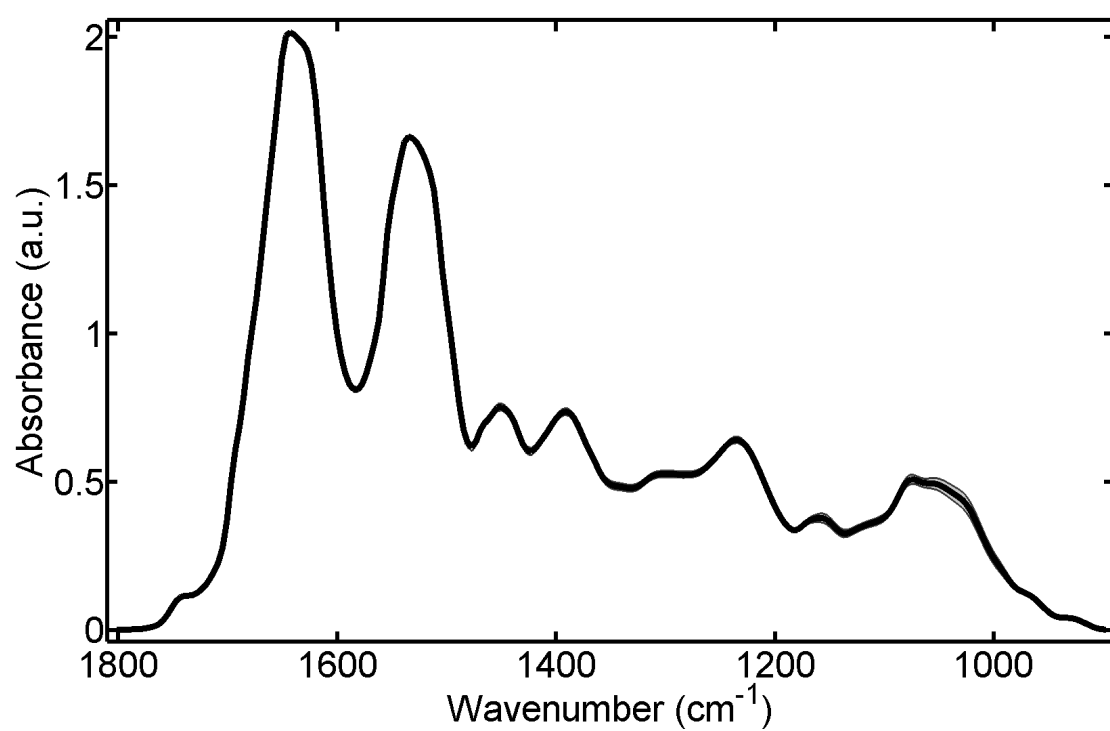

**Figure S4** - Mean spectrum with respective standard deviation band for the cervical cytology specimen [from a single study participant (patient)] with *lowest* mean variance across all wavenumbers.
